# Supplementary material
Source: HighWire-hosted journal article supplement (https://www.cmajopen.ca/highwire/filestream/81011/field_highwire_adjunct_files/1/open-2015-0087-2-at.pdf)
Supplement: open-2015-0087-2-at.pdf [file open-2015-0087-2-at.pdf]

**Appendix 2 (as supplied by the authors): Regression results for predictors of emergency department (ED) visits, by visit acuity\***

| Covariate                       | High urgency ED visits |              |                                         |                |                               | Low urgency ED visits |              |                                                  |              |                               |
|---------------------------------|------------------------|--------------|-----------------------------------------|----------------|-------------------------------|-----------------------|--------------|--------------------------------------------------|--------------|-------------------------------|
|                                 | ED visits              | Person-years | ED visits per 100 person-years (95% CI) |                | Adjusted rate ratios (95% CI) | ED visits             | Person-years | ED visits per 100 person-years patients (95% CI) |              | Adjusted rate ratios (95% CI) |
| HIV status                      |                        |              |                                         |                |                               |                       |              |                                                  |              |                               |
| Non-HIV                         | 11465                  | 57672.8      | 19.9                                    | (19.1, 20.7)   | 1.00                          | 6465                  | 57672.8      | 11.2                                             | (10.5, 11.9) | 1.00                          |
| HIV                             | 6444                   | 14370        | 44.8                                    | (42.4, 47.5)   | 1.61 (1.53, 1.69)             | 3198                  | 14370.0      | 22.3                                             | (20.6, 24.0) | 1.55 (1.45, 1.65)             |
| Income quintile                 |                        |              |                                         |                |                               |                       |              |                                                  |              |                               |
| 5 (highest)                     | 2565                   | 13224.6      | 19.4                                    | (18.1, 20.7)   | 1.00                          | 1409                  | 13224.6      | 10.7                                             | (9.8, 11.6)  | 1.00                          |
| 4                               | 2464                   | 12101.2      | 20.4                                    | (19.1, 21.7)   | 1.03 (0.95, 1.11)             | 1461                  | 12101.2      | 12.1                                             | (11.1, 13.1) | 1.12 (1.01, 1.23)             |
| 3                               | 3178                   | 12798.6      | 24.8                                    | (23.1, 26.7)   | 1.19 (1.11, 1.28)             | 1793                  | 12798.6      | 14.0                                             | (12.7, 15.4) | 1.26 (1.15, 1.38)             |
| 2                               | 3853                   | 15274.5      | 25.2                                    | (23.7, 26.8)   | 1.22 (1.13, 1.31)             | 2111                  | 15274.5      | 13.8                                             | (12.7, 15.1) | 1.27 (1.16, 1.39)             |
| 1 (lowest)                      | 5679                   | 18015.8      | 31.5                                    | (29.1, 34.1)   | 1.38 (1.29, 1.48)             | 2783                  | 18015.8      | 15.4                                             | (14, 17.1)   | 1.31 (1.18, 1.43)             |
| Rural residence                 |                        |              |                                         |                |                               |                       |              |                                                  |              |                               |
| Urban residence                 | 16924                  | 68225.9      | 24.8                                    | (23.9, 25.8)   | 1.00                          | 1377                  | 3504.2       | 39.3                                             | (34.6, 44.6) | 1.00                          |
| Rural residence                 | 933                    | 3504.15      | 26.6                                    | (24.2, 29.3)   | 1.13 (1.01, 1.25)             | 40                    | 312.8        | 12.8                                             | (4.4, 37.0)  | 2.85 (2.54, 3.19)             |
| Primary care visits (past year) |                        |              |                                         |                |                               |                       |              |                                                  |              |                               |
| 0 visits                        | 2604                   | 18544.3      | 14.0                                    | (13.0, 15.2)   | 1.00                          | 1697                  | 18544.3      | 9.2                                              | (8.4, 10.0)  | 1.00                          |
| 1 to 2 visits                   | 3595                   | 19538.4      | 18.4                                    | (17.2, 19.7)   | 1.30 (1.22, 1.39)             | 2149                  | 19538.4      | 11.0                                             | (10.1, 11.9) | 1.22 (1.12, 1.32)             |
| 3 or more visits                | 11710                  | 33960.1      | 34.5                                    | (33.0, 36.0)   | 1.51 (1.42, 1.61)             | 5817                  | 33960.1      | 17.1                                             | (16.0, 18.3) | 1.38 (1.28, 1.49)             |
| Aggregated diagnosis groups     |                        |              |                                         |                |                               |                       |              |                                                  |              |                               |
| 0 to 5                          | 9973                   | 60123.7      | 16.6                                    | (16.0, 17.2)   | 1.00                          | 6246                  | 60123.7      | 10.4                                             | (9.8, 11.0)  | 1.00                          |
| 6 to 9                          | 5145                   | 9979.93      | 51.6                                    | (48.5, 54.8)   | 2.54 (2.39, 2.69)             | 2257                  | 9979.9       | 22.6                                             | (20.6, 24.8) | 1.84 (1.71, 1.99)             |
| 10 or more                      | 2791                   | 1939.23      | 144.0                                   | (129.9, 159.4) | 6.98 (6.30, 7.74)             | 1160                  | 1939.2       | 59.8                                             | (51.4, 69.6) | 4.62 (4.06, 5.26)             |

\*Categorized using Canadian Triage And Acuity Scale (CTAS); low urgency were visits triaged as CTAS 4 (less urgent) or CTAS 5 (non-urgent), whereas high urgency visits were visits triaged as CTAS 1 (resuscitation required), CTAS 2 (emergent care required) or CTAS 3 (urgent care required)
